# Supplementary material for: The plasminogen binding protein PbsP is required for brain invasion by hypervirulent CC17 Group B streptococci
Source: PubMed Central journal article supplement (PMC6156580; doi:10.1038/s41598-018-32774-8), 2018-09-25
Supplement: 41598_2018_32774_MOESM1_ESM.pdf [file 41598_2018_32774_MOESM1_ESM.pdf]

**The plasminogen binding protein PbsP is required  
for brain invasion by hypervirulent CC17 Group B streptococci**

Germana Lentini<sup>1\*</sup>, Angelina Midiri<sup>1\*</sup>, Arnaud Firon<sup>2</sup>, Roberta Galbo<sup>3</sup>,  
Giuseppe Mancuso<sup>1</sup>, Carmelo Biondo<sup>1</sup>, Emanuela Mazzon<sup>4</sup>, Annamaria Passantino<sup>5</sup>, Letizia  
Romeo<sup>4</sup>, Patrick Trieu-Cuot<sup>2</sup>, Giuseppe Teti<sup>1,6§</sup> and Concetta Beninati<sup>1,7</sup>

<sup>1</sup>*Metchnikoff Laboratory, Departments of Human Pathology and Medicine, University of Messina, Messina, Italy;* <sup>2</sup>*Institut Pasteur, Unité de Biologie des Bactéries Pathogènes à Gram Positif, CNRS ERL3526, 75015 Paris, France;* <sup>3</sup>*Department of Chemical, Biological, Pharmaceutical and Environmental Sciences, University of Messina, Messina, Italy;* <sup>4</sup>*IRCCS Centro Neurolesi Bonino Pulejo, Messina;* <sup>5</sup>*Department of Veterinary Sciences, University of Messina, Messina, Italy;* <sup>6</sup>*Charybdis Vaccines Srl, Messina, Italy;* <sup>7</sup>*Scylla Biotech Srl, Messina, Italy*

Figure-S1 (Teti)

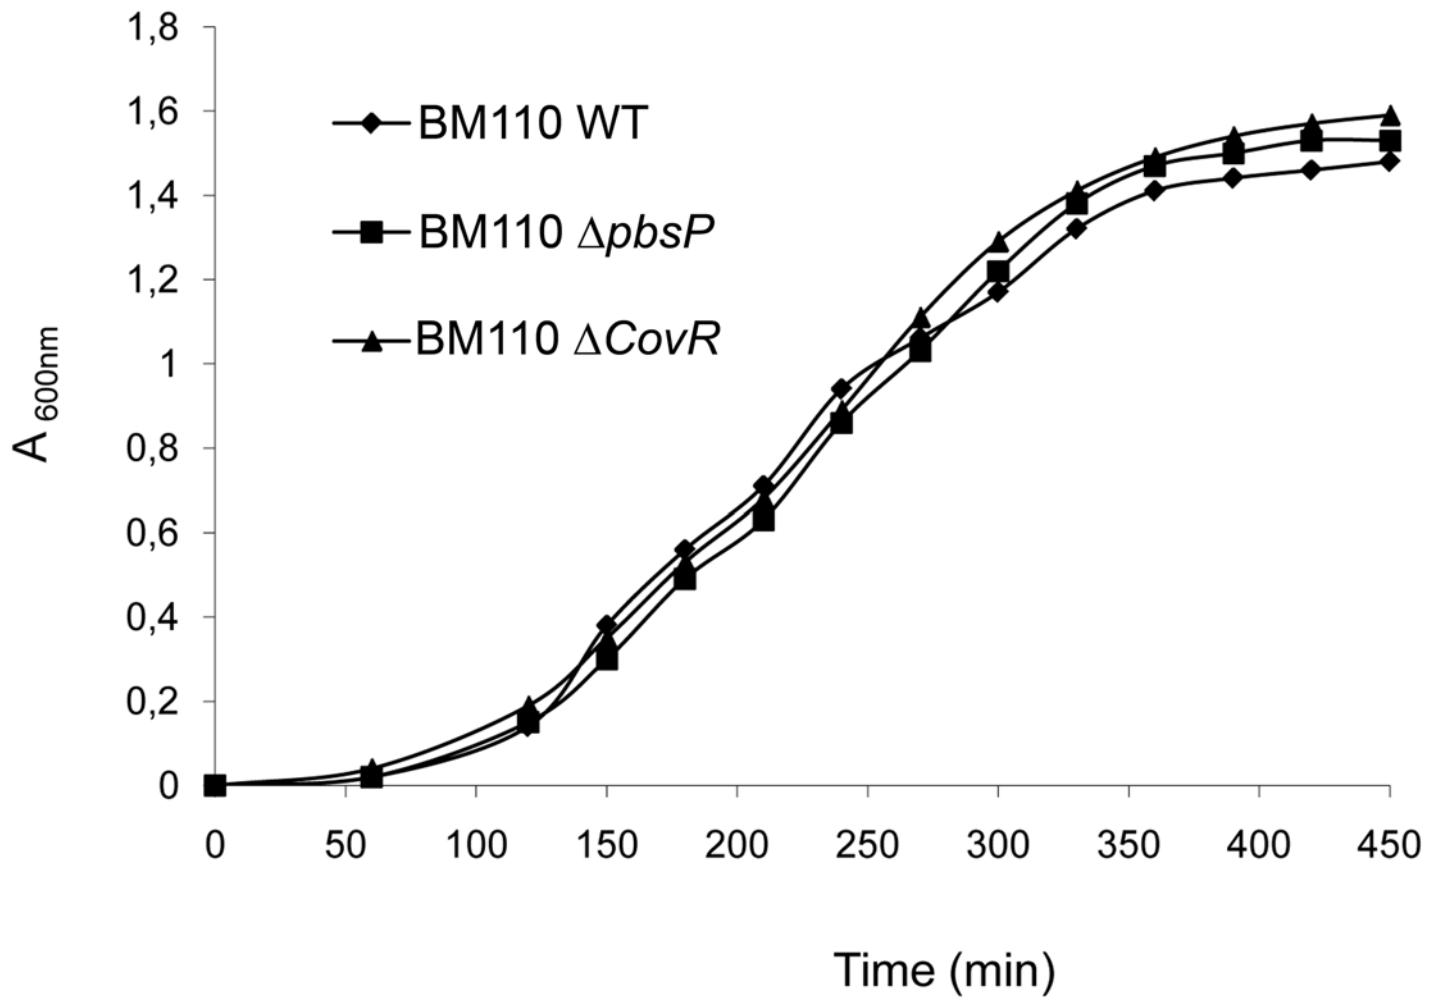

Fig. S2 (Teti)

A

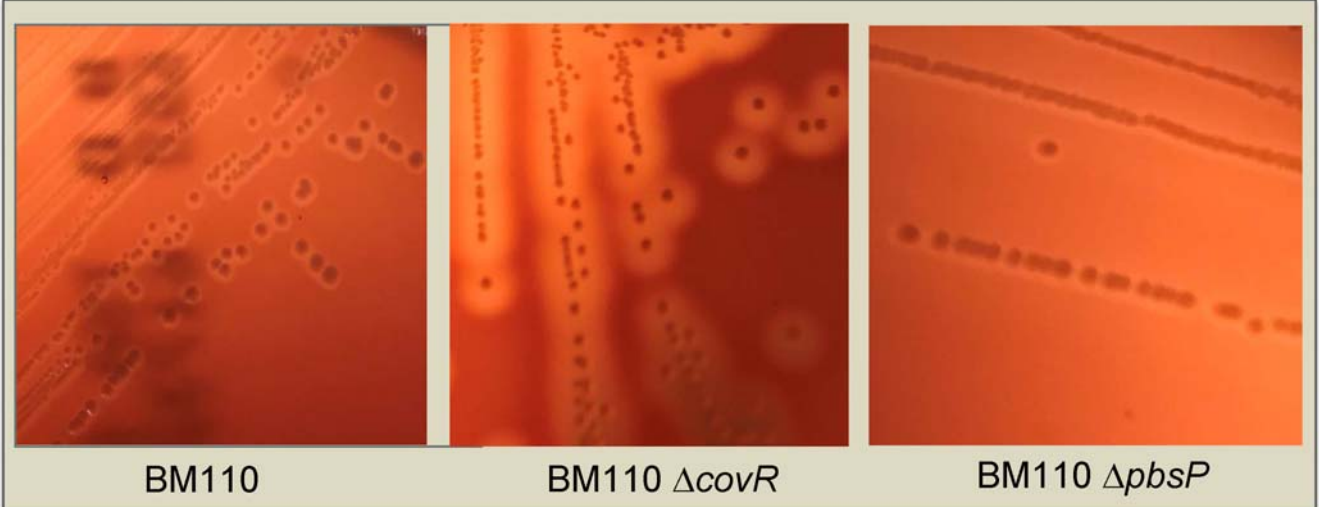

B

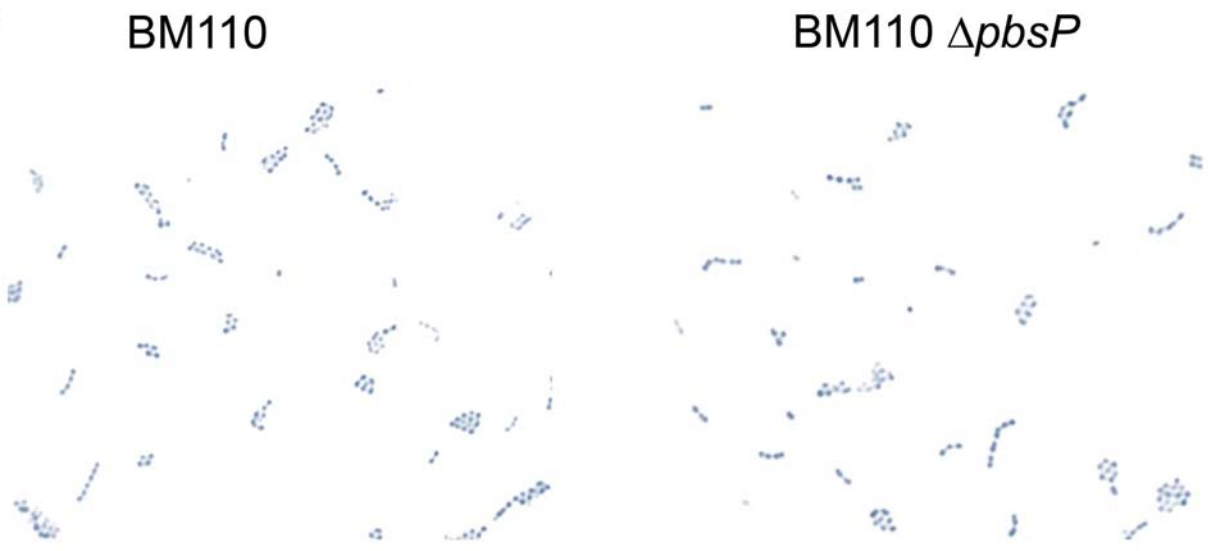

# Fig. S3 (Teti)

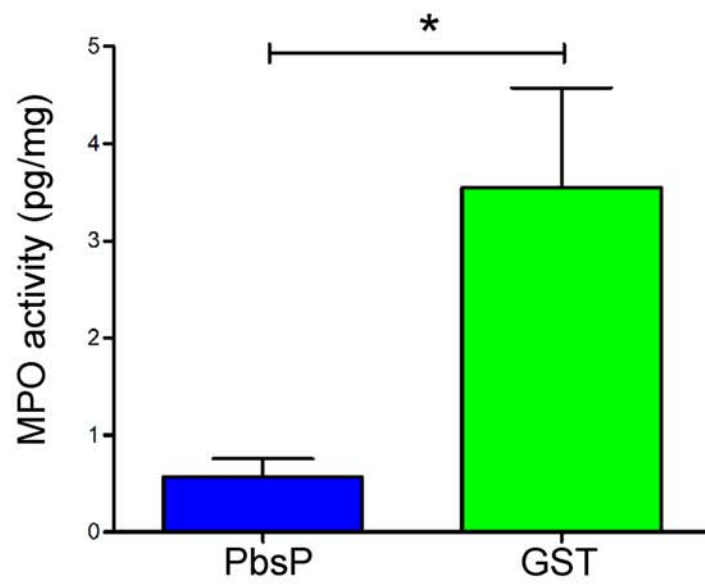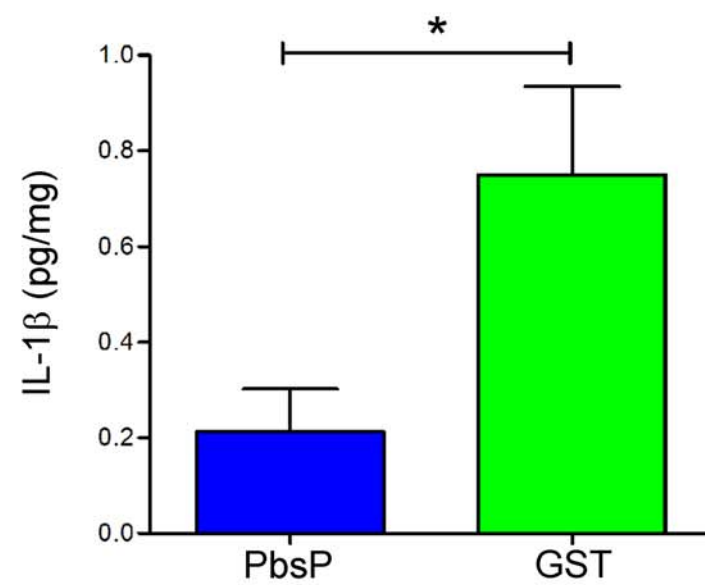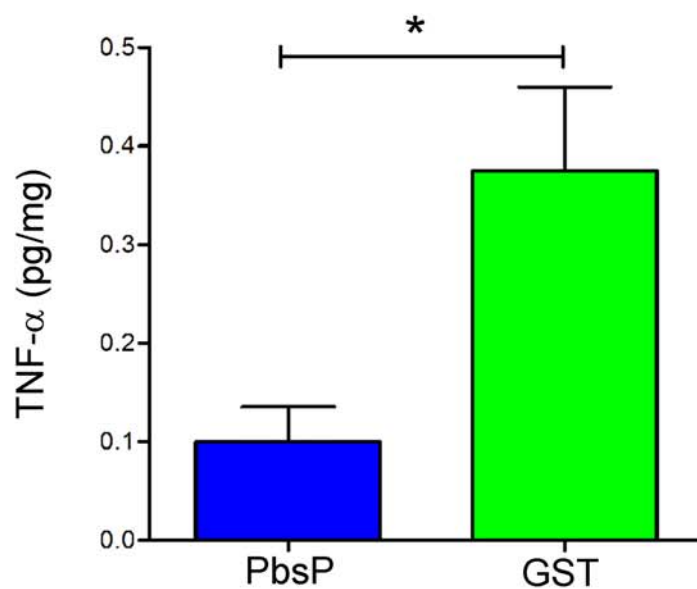

# Figure-S4 (Teti)

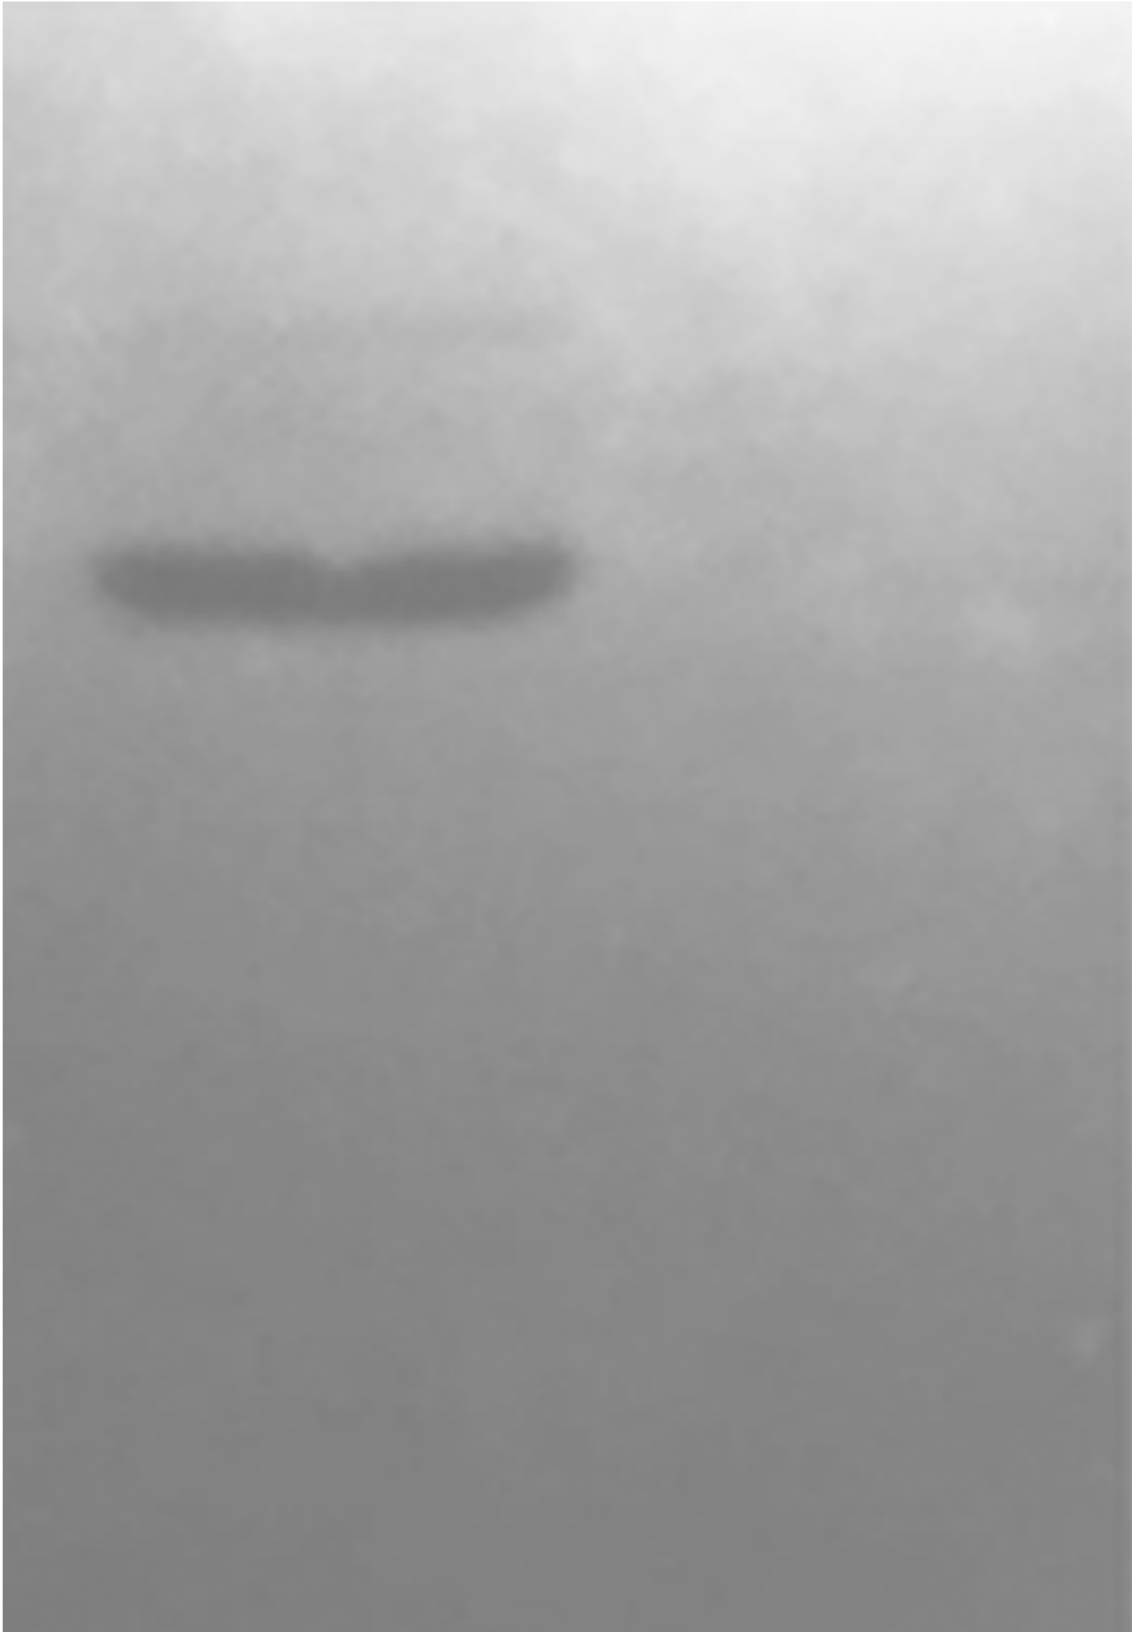

**Figure S1. Growth in Todd-Hewitt broth of GBS BM110 mutants.**

Growth curves of BM110 (WT, diamonds), *pbsP* deletion mutant (BM110  $\Delta$ *pbsP*, squares) and *CovR* deletion mutant (BM110  $\Delta$ *CovR*, triangles) GBS strains in Todd-Hewitt broth.

**Fig. S2. Colony morphology and microscopic appearance of GBS BM110 mutants.**

(A) Colony morphology of wild-type BM110 strain (BM110) and its *CovR* or *pbsP* deletion mutants (BM110  $\Delta$ *CovR* or BM110  $\Delta$ *pbsP*, respectively) on blood agar. (B) Cell morphology after Gram stain of wild-type BM110 strain (BM110) and its *pbsP* deletion mutant (BM110  $\Delta$ *pbsP*).

**Fig. S3. PbsP-based immunization prevents GBS-induced encephalitis.** MPO, IL-1 $\beta$  and TNF- $\alpha$  protein levels were measured in organ homogenates from mice immunized with recombinant PbsP fused to glutathione-S-transferase (GST-PbsP) or with GST as a control. Data are expressed as means  $\pm$  standard deviations of three duplicate observations, each conducted with a different animal, in the course of a single experiment. \*,  $p < 0.05$  by one way ANOVA.

**Figure S4. Image from the same blot shown in Fig 1, obtained with a higher exposure**

#

## Table S1

### RT-PCR primer and probe sequences

|                |                          |
|----------------|--------------------------|
| pbsp_up        | TGATGGTGGCTACCTCTGTTAGAA |
| pbsp_low       | AGTCGTTTTGGTCATCGCTACA   |
| gyr_up         | AACTGGGAAGGGATCAATTGTCT  |
| gyr_low        | CTTCCCATTGGAAGTTGTTTCAA  |
| FAM-pbsp_probe | ATGGCAACGCCGACAC         |
| VIC-gyr_probe  | ACGTTCACGGACTGAA         |
